# Supplementary material for: In Situ Electrochemical Characterization of a Microbial Fuel Cell Biocathode Running on Wastewater
Source: MDPI journal article supplement (doi:10.3390/catal11070839), 2021-07-11
Supplement: s1 [file s1]

Archive with 1 entries (1 files):
- catalysts-1243107-supplementary.pdf
