# Supplementary material for: In Situ Electrochemical Characterization of a Microbial Fuel Cell Biocathode Running on Wastewater
Source: MDPI journal article supplement (doi:10.3390/catal11070839), 2021-07-11
Supplement: s1 [file s1 › catalysts-1243107-supplementary.pdf]

## Supplementary Information:

### In Situ Electrochemical Characterization of a Microbial Fuel Cell

#### Biocathode Running on Wastewater

S. Venkata Ramana <sup>1,2</sup>, C. M. Cordas <sup>3,\*</sup>, S. C. Matias <sup>1</sup>, L P. Fonseca <sup>1</sup>

##### 1. Polarization curve

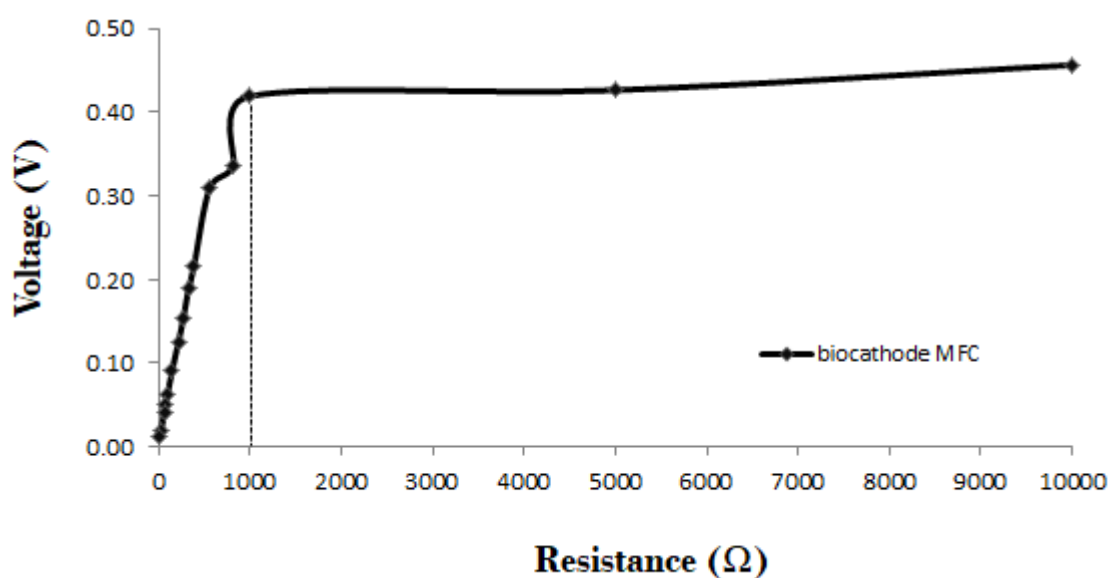

Figure S1. Variation of the MFC (running with a biocathode) output voltage versus the applied external resistance (between 15 to 15000 Ω); the remaining experimental conditions are described in the manuscript main text.

## 2. Abiotic MFC operational parameters

Table S1. Abiotic cathode MFC operating parameters

| Operation Parameters                  | Abiotic cathode MFC |
|---------------------------------------|---------------------|
| Batch mode operation time (days)      | 165                 |
| OCV (mV)                              | 435                 |
| Power density (mW/m <sup>2</sup> )    | 51                  |
| COD removal efficiency (%)            | 90                  |
| Coulombic efficiency (%)              | 31                  |
| Current density (mA /m <sup>2</sup> ) | 122                 |

## 3. Cyclic voltammograms of the ex-situ experiments (full scale)

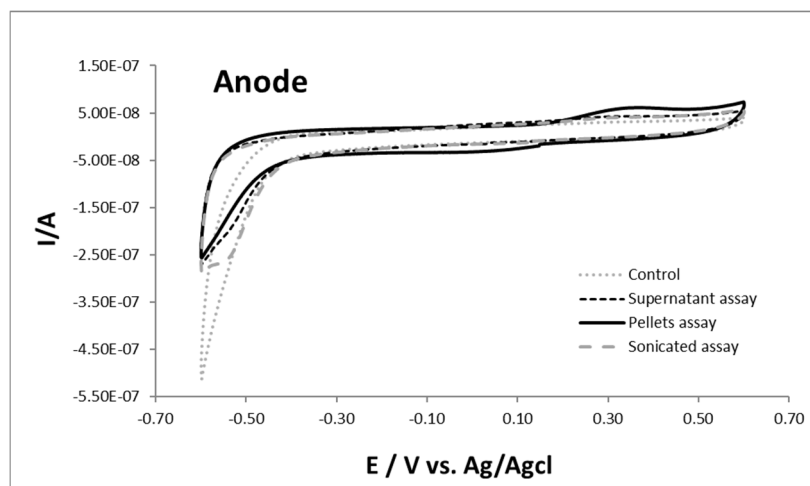

Figure S2. *Ex-situ* cyclic voltammograms attained with anodic chamber wastewater sample with bacteria cells in suspension (on gold electrode); full potential window; scan rate  $20 \times 10^{-3} \text{ Vs}^{-1}$ .

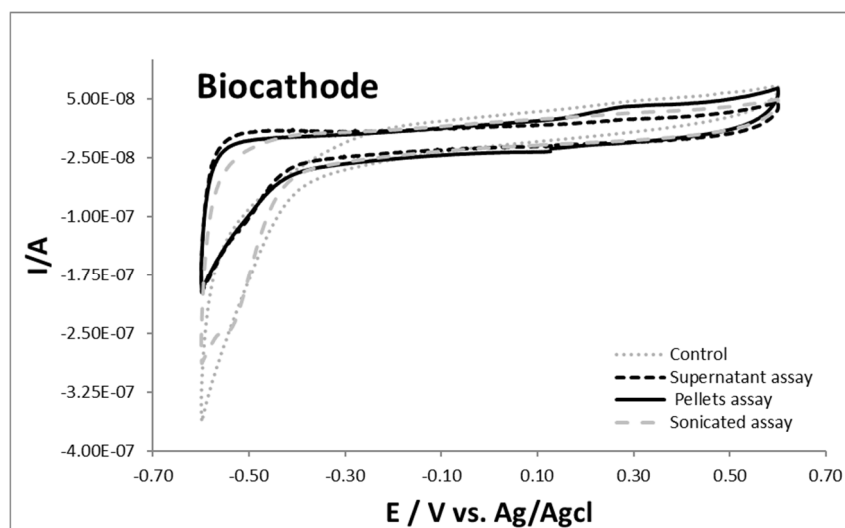

Figure S3. *Ex-situ* cyclic voltammograms attained in the biocathode chamber wastewater sample with bacteria cells in suspension (on gold electrode); full potential window; scan rate  $20 \times 10^{-3} \text{ Vs}^{-1}$ .
